# Supplementary material for: Daily temperature records from a mesonet in the foothills of the Canadian Rocky Mountains, 2005–2010
Source: Copernicus journal article supplement (doi:10.5194/essd-2017-107), 2017-09-21
Supplement: Supplementary file [file essd-2017-107-AC1-supplement.pdf]

**Authors' response to Anonymous Referee #1 interactive comment on "Daily temperature records from a mesonet in the foothills of the Canadian Rocky Mountains, 2005–2010" by Wendy H. Wood et al.**

Author comments are italicized and prefixed with AC:

SPECIFIC COMMENTS Why are rainfall and relative humidity not presented within the manuscript? Is it because, if presented, the manuscript would become too long, or due to the fact that it was not possible to produce reliable datasets with these other variables?

*AC: We are in the process of applying quality control processes to the relative humidity and rainfall data. These will be made available and linked to this dataset when possible. We anticipate extensive documentation needed on the nature and QC of these data, however, so think this would be too much for the current manuscript.*

Figure 3 is of very poor quality and needs improving.

*AC: The figure has been removed as it was not discussed in detail in the text.*

Page 12, line 16: Mountain pine beetle is not an invasive species in Western Alberta, but endemic. It is however able to cause outbreaks, and hence the comment is relevant, but needs being corrected.

*AC: Thanks to the reviewer for catching this. The text has been modified (pg 13, ln 3).*
